# Supplementary material for: Experimental and DFT insights into the adsorption mechanism of methylene blue by alkali-modified corn straw biochar
Source: Royal Society of Chemistry journal article supplement (doi:10.1039/d3ra05964b), 2024-01-01
Supplement: d3ra05964b1.pdf [file d3ra05964b1.pdf]

## Supplementary Material

for

### *Experimental and DFT insights into the adsorption mechanism of methylene blue by alkali-modified corn straw biochar*

Huali Yu §<sup>a</sup>, Yulu Zhang §<sup>a</sup>, Lianfeng Wang<sup>a,\*</sup>, Ya Tuo<sup>b</sup>, Song Yan<sup>a</sup>, Junling Ma<sup>a</sup>,  
Xue Zhang<sup>a</sup>, Yu Shen<sup>a</sup>, Haiyan Guo<sup>a</sup>, Lei Han<sup>a</sup>

<sup>a</sup>School of Environmental & Chemical Engineering, Dalian Jiaotong University, Dalian  
116021, China

<sup>b</sup> Environmental Development Center of the Ministry of Ecology and Environment,  
Beijing 100006, China

\* Corresponding author, Lianfeng Wang

Phone/Fax: +86-411-84107585,

Email: wanglfdl@aliyun.com

§ Huali Yu and Yulu Zhang contributed equally to this paper.

*This file contains 7 tables and 8 figures.*

**Table S1.** Orthogonal experiment results and range analyses of NaOH-modified biochar.

| Sample             | Pyrolysis<br>temperature<br>(°C) A                                                          | Solid-liquid<br>ratio<br>(v/w) B | NaOH<br>concentration<br>(M) C | Modification<br>time<br>(h) D | Removal<br>efficiency<br>(%) |
|--------------------|---------------------------------------------------------------------------------------------|----------------------------------|--------------------------------|-------------------------------|------------------------------|
| C1                 | 300                                                                                         | 1:10                             | 0.5                            | 6                             | 98.12                        |
| C2                 | 300                                                                                         | 1:20                             | 1                              | 12                            | 98.28                        |
| C3                 | 300                                                                                         | 1:30                             | 1.5                            | 18                            | 98.20                        |
| C4                 | 300                                                                                         | 1:40                             | 2                              | 24                            | 98.79                        |
| C5                 | 400                                                                                         | 1:10                             | 1                              | 18                            | 59.00                        |
| C6                 | 400                                                                                         | 1:20                             | 0.5                            | 24                            | 45.53                        |
| C7                 | 400                                                                                         | 1:30                             | 2                              | 6                             | 40.51                        |
| C8                 | 400                                                                                         | 1:40                             | 1.5                            | 12                            | 70.34                        |
| C9                 | 500                                                                                         | 1:10                             | 1.5                            | 24                            | 43.30                        |
| C10                | 500                                                                                         | 1:20                             | 2                              | 18                            | 44.79                        |
| C11                | 500                                                                                         | 1:30                             | 0.5                            | 12                            | 25.46                        |
| C12                | 500                                                                                         | 1:40                             | 1                              | 6                             | 30.48                        |
| C13                | 600                                                                                         | 1:10                             | 2                              | 12                            | 96.32                        |
| C14                | 600                                                                                         | 1:20                             | 1.5                            | 6                             | 92.92                        |
| C15                | 600                                                                                         | 1:30                             | 1                              | 24                            | 93.84                        |
| C16                | 600                                                                                         | 1:40                             | 0.5                            | 18                            | 91.61                        |
| K <sub>1-1</sub>   | 98.3                                                                                        | 74.2                             | 65.2                           | 65.5                          |                              |
| K <sub>1-2</sub>   | 53.8                                                                                        | 70.4                             | 70.4                           | 72.6                          |                              |
| K <sub>1-3</sub>   | 36.0                                                                                        | 64.5                             | 76.2                           | 73.4                          |                              |
| K <sub>1-4</sub>   | 93.7                                                                                        | 72.8                             | 70.1                           | 70.4                          |                              |
| Range              | 62.3                                                                                        | 9.7                              | 11.0                           | 7.9                           |                              |
| Factor priority    | A > C > B > D                                                                               |                                  |                                |                               |                              |
| Optimal conditions | A <sub>1</sub> B <sub>1</sub> C <sub>3</sub> D <sub>3</sub> : 300 °C, 1:10, 1.5 M, and 18 h |                                  |                                |                               |                              |

K<sub>1-1</sub>~K<sub>1-4</sub> corresponded to the average value of different levels of factors.

**Table S2.** Results of variance analysis of NaOH-modified biochar orthogonal experiment.

| Factors                    | Sum of squares | Degrees of freedom | Mean square | F-value | Significance |
|----------------------------|----------------|--------------------|-------------|---------|--------------|
| Pyrolysis temperature (°C) | 1.112          | 3                  | 0.371       | 51.496  | ***          |
| Solid-liquid ratio (v/w)   | 0.022          | 3                  | 0.007       | 1.016   |              |
| NaOH concentration (M)     | 0.024          | 3                  | 0.008       | 1.126   |              |
| Modification time (h)      | 0.015          | 3                  | 0.005       | 0.7     |              |

P < 0.05 indicated a significant difference represented by \*\*\*.

**Table S3.** Selected characteristics of NaCBC<sub>300</sub>, CBC<sub>300</sub>, CBC<sub>400</sub>, CBC<sub>500</sub>, and CBC<sub>600</sub>.

| Species              | SSA (m <sup>2</sup> /g) | TPV (cm <sup>3</sup> /g) | AP (nm) |
|----------------------|-------------------------|--------------------------|---------|
| NaCBC <sub>300</sub> | 92.005                  | 0.142                    | 10.239  |
| CBC <sub>300</sub>   | 101.213                 | 0.157                    | 8.589   |
| CBC <sub>400</sub>   | 148.852                 | 0.169                    | 7.988   |
| CBC <sub>500</sub>   | 169.562                 | 0.171                    | 6.525   |
| CBC <sub>600</sub>   | 187.137                 | 0.189                    | 5.834   |

**Table S4.** The location and assignments of FTIR peaks.

| No. | Location (cm <sup>-1</sup> ) | Assignments                                      | Reference                                    |
|-----|------------------------------|--------------------------------------------------|----------------------------------------------|
| 1   | 3408                         | -OH stretch vibration                            | (Mayakaduwa et al., 2017)                    |
| 2   | 2924-2933                    | C-H vibration of -CH <sub>x</sub> group          | (Rong et al., 2020)                          |
| 3   | 2359                         | CO <sub>2</sub> species                          | (Al-Wabel et al., 2019)                      |
| 4   | 1700                         | C=O stretch of ketones, aldehydes,<br>and esters | (Rong et al., 2020; Tomczyk<br>et al., 2020) |
| 5   | 1609-1632                    | C=O stretch in the aromatic rings                | (Chen et al., 2022)                          |
| 6   | 1531                         | C=C stretching vibration                         | (Wang et al., 2020)                          |
| 7   | 1444-1448                    | aromatic C=O and C=C functional<br>groups        | (Rong et al., 2020)                          |
| 8   | 670                          | CO <sub>2</sub> species                          | (Al-Wabel et al., 2019)                      |

**Table S5.** Fitting parameters of XPS C 1s, O 1s, and N 1s spectra in different systems.

|                      | C 1s           | C=C    | C-C    | C-N    | C-O    | C=O    | C-Na   |
|----------------------|----------------|--------|--------|--------|--------|--------|--------|
|                      | BE (eV)        | 284.00 | 284.63 | 285.62 | 286.85 | 288.50 | -      |
| CBC <sub>300</sub>   | Peak area      | 31231  | 28899  | 20618  | 5805   | 3167   | -      |
|                      | Percentage (%) | 34.81  | 32.21  | 22.98  | 6.47   | 3.53   | -      |
|                      | BE (eV)        | 284.00 | 285.58 | 285.40 | 286.27 | 287.87 | 282.89 |
| NaCBC <sub>300</sub> | Peak area      | 28872  | 44204  | 16100  | 10637  | 9702   | 1747   |
|                      | Percentage (%) | 25.95  | 39.73  | 14.47  | 9.56   | 8.72   | 1.57   |
|                      | O 1s           | C-O    | -OH    | C=O    |        |        |        |
|                      | BE (eV)        | 531.40 | -      | 532.79 |        |        |        |
| CBC <sub>300</sub>   | Peak area      | 21004  | -      | 32591  |        |        |        |
|                      | Percentage (%) | 39.19  | -      | 60.81  |        |        |        |
|                      | BE (eV)        | 531.24 | 532.08 | 533.15 |        |        |        |
| NaCBC <sub>300</sub> | Peak area      | 16340  | 13669  | 34718  |        |        |        |
|                      | Percentage (%) | 25.75  | 21.54  | 52.71  |        |        |        |
|                      | N 1s           | -NH    | C-N    |        |        |        |        |
|                      | BE (eV)        | 398.99 | 400.23 |        |        |        |        |
| CBC <sub>300</sub>   | Peak area      | 1272   | 3698   |        |        |        |        |
|                      | Percentage (%) | 25.60  | 74.40  |        |        |        |        |
|                      | BE (eV)        | 398.86 | 400.22 |        |        |        |        |
| NaCBC <sub>300</sub> | Peak area      | 1297   | 4260   |        |        |        |        |
|                      | Percentage (%) | 23.34  | 76.66  |        |        |        |        |

**Table S6.** Isothermal adsorption fitting parameters of different NaCBC<sub>300</sub> dosages for MB.

| Dosage<br>(g/L) | Langmuir              |                |                | Freundlich     |        |                |
|-----------------|-----------------------|----------------|----------------|----------------|--------|----------------|
|                 | Q <sub>m</sub> (mg/g) | K <sub>L</sub> | R <sup>2</sup> | K <sub>F</sub> | n      | R <sup>2</sup> |
| 0.02            | 250.155               | 124.659        | 0.834          | 182.756        | 12.752 | 0.924          |
| 0.04            | 210.865               | 0.941          | 0.781          | 115.613        | 6.321  | 0.994          |
| 0.06            | 174.196               | 3.145          | 0.900          | 113.367        | 6.455  | 0.893          |
| 0.08            | 149.204               | 3.367          | 0.992          | 95.885         | 3.976  | 0.916          |
| 0.10            | 125.210               | 7.043          | 0.963          | 101.537        | 3.459  | 0.950          |

**Table S7.** HOMO and LUMO energy values and other parameters of MB.

| Parameters                                         | Energy (eV) |
|----------------------------------------------------|-------------|
| $E_{\text{HOMO}}$                                  | -2.8685     |
| $E_{\text{LUMO}}$                                  | -0.9166     |
| Energy gap ( $E_{\text{LUMO}} - E_{\text{HOMO}}$ ) | 1.9519      |
| Ionization potential ( $I = -E_{\text{HOMO}}$ )    | 2.8685      |
| Electron affinity ( $A = -E_{\text{LUMO}}$ )       | 0.9166      |
| Chemical hardness ( $\eta = (I - A)/2$ )           | 0.9760      |
| Chemical softness ( $\zeta = 1/2\eta$ )            | 0.5123      |
| Electronegativity ( $\chi = (I + A)/2$ )           | 1.8926      |
| Chemical potential ( $\mu = -(I + A)/2$ )          | -1.8926     |
| Electrophilicity index ( $\omega = \mu^2/2\eta$ )  | 1.8350      |



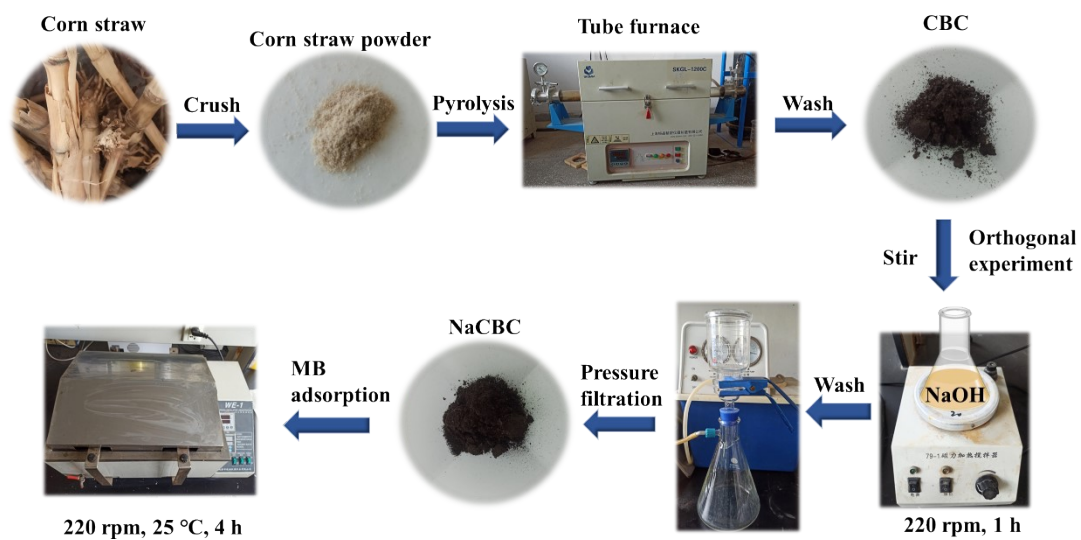

**Fig. S1.** Flow chart for CBC and NaCBC preparation and MB adsorption.

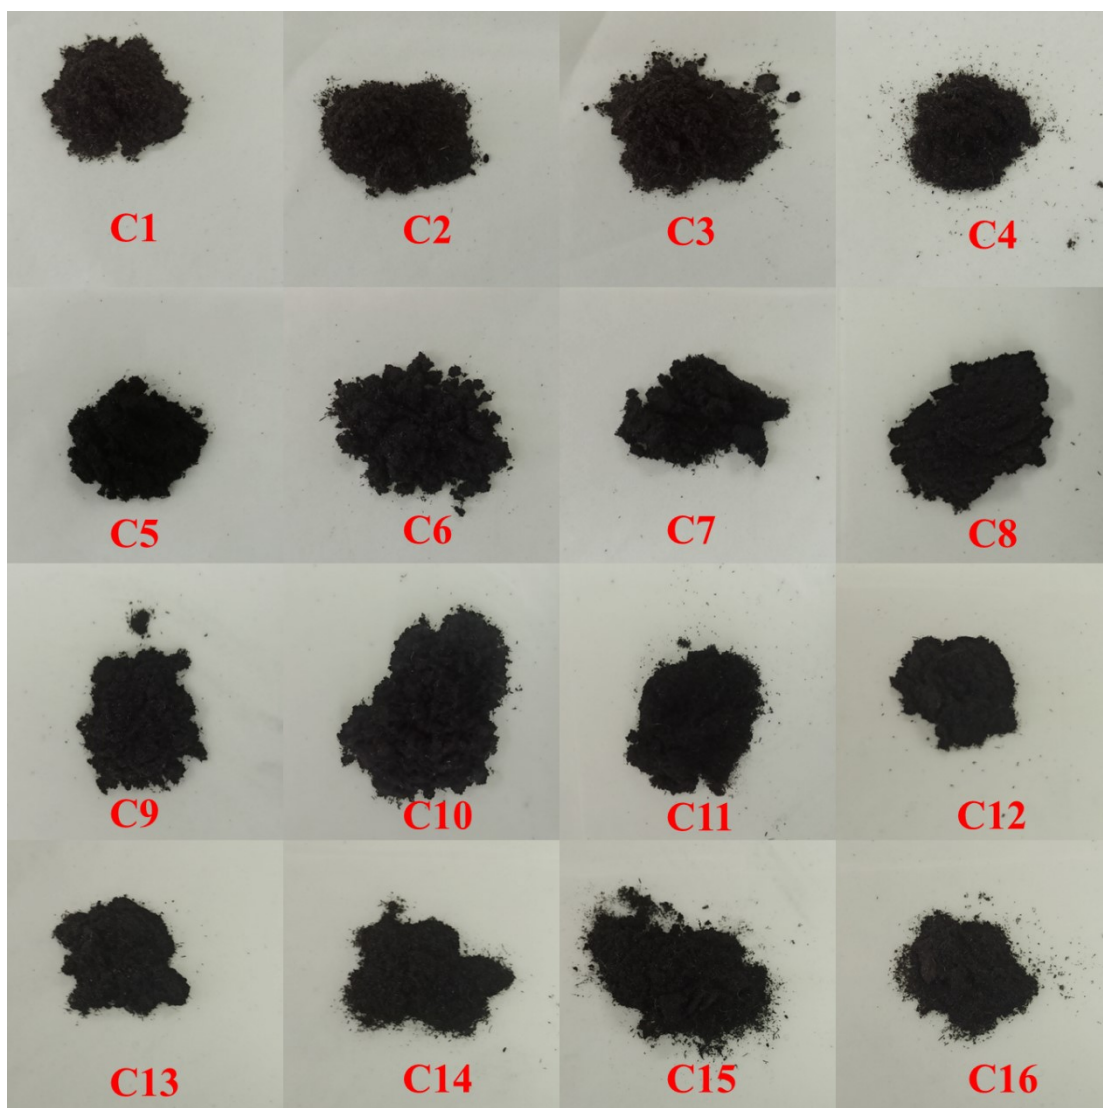

**Fig. S2.** Morphologies of NaCBCs (C1-C16).

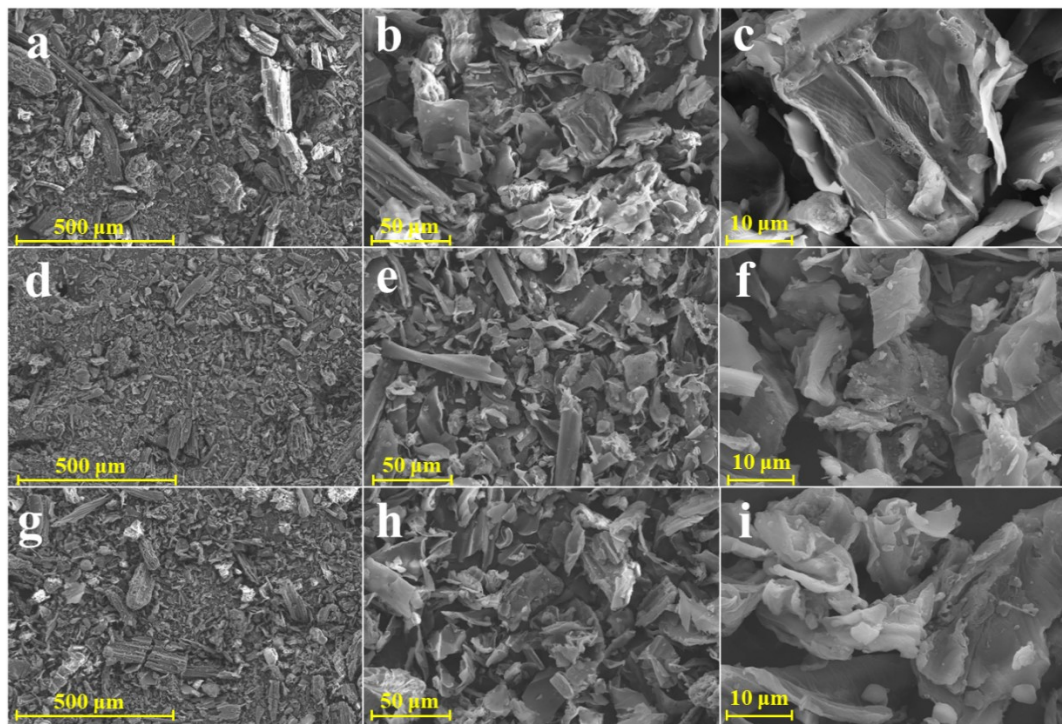

**Fig. S3.** SEM observations of (a-c) CBC<sub>400</sub>, (d-f) CBC<sub>500</sub>, and (g-i) CBC<sub>600</sub>.

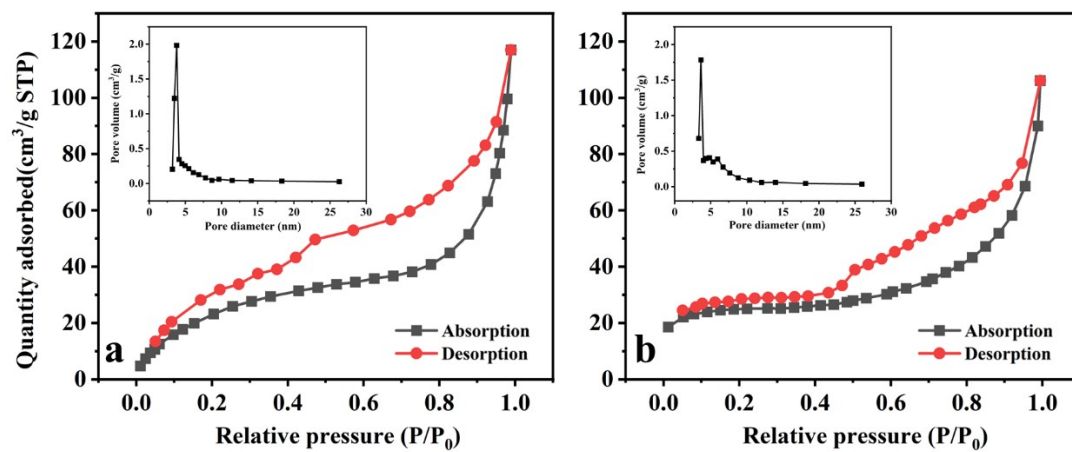

**Fig. S4.** N<sub>2</sub> adsorption/desorption isotherms and pore size distribution plots (inset) of (a) CBC<sub>300</sub> and (b) NaCBC<sub>300</sub>.

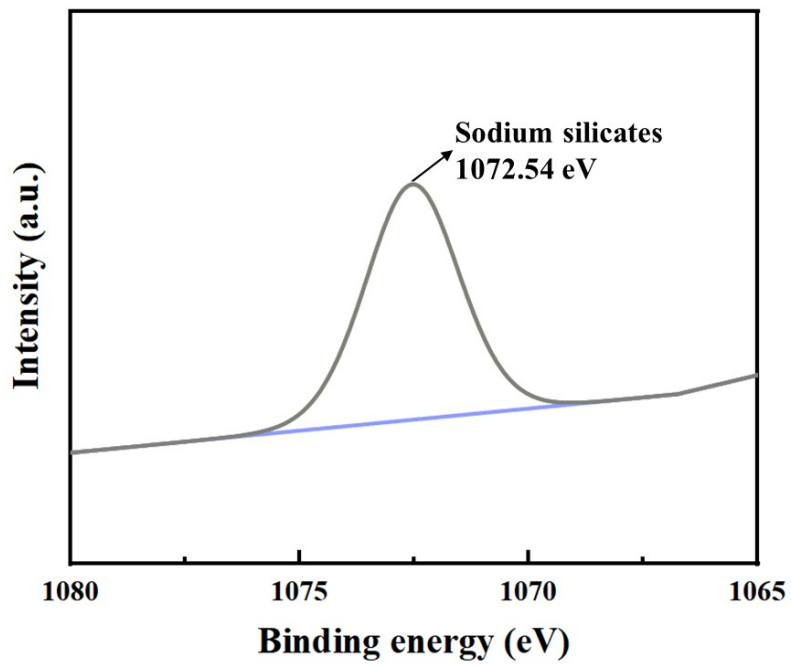

Fig. S5. XPS Na 1s spectrum of NaCBC<sub>300</sub>.

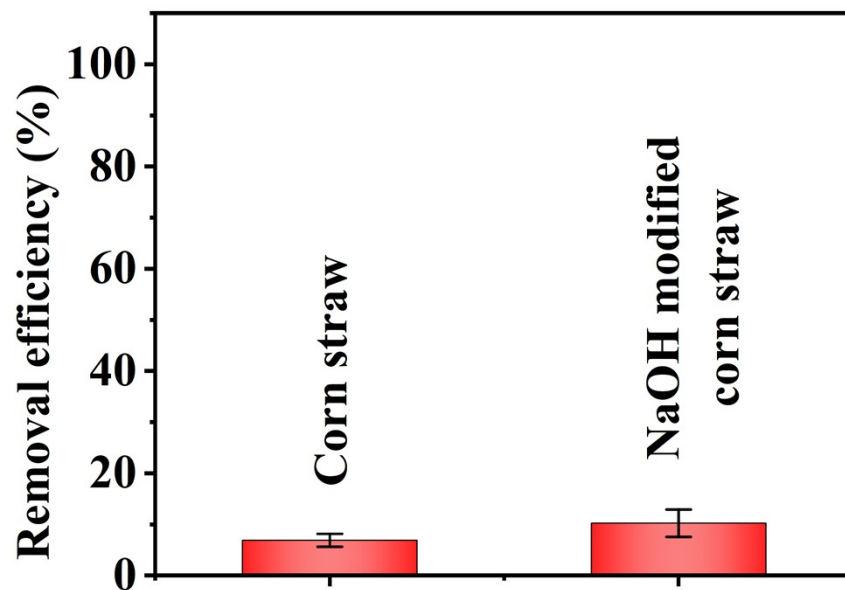

**Fig. S6.** MB adsorption by pristine corn straw and NaOH modified corn straw without pyrolysis.

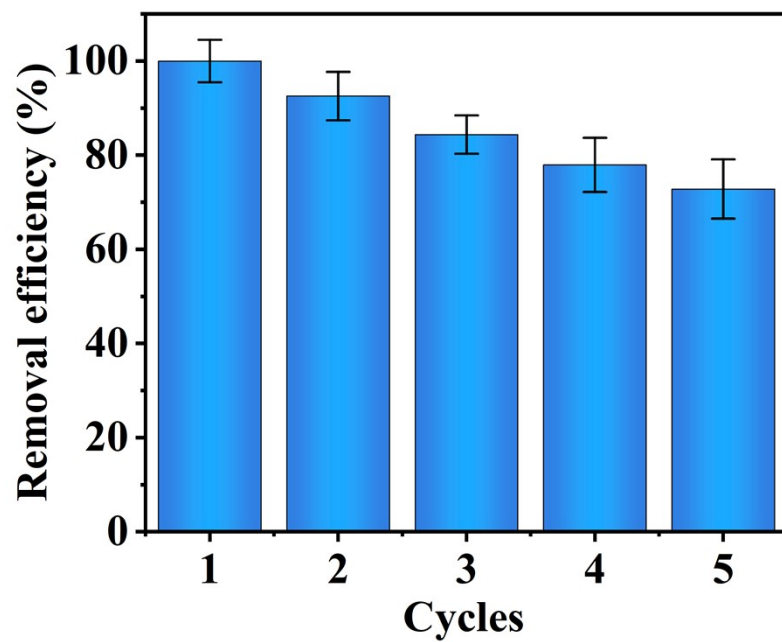

Fig. S7. Reusability of NaCBC<sub>300</sub> for MB removal.

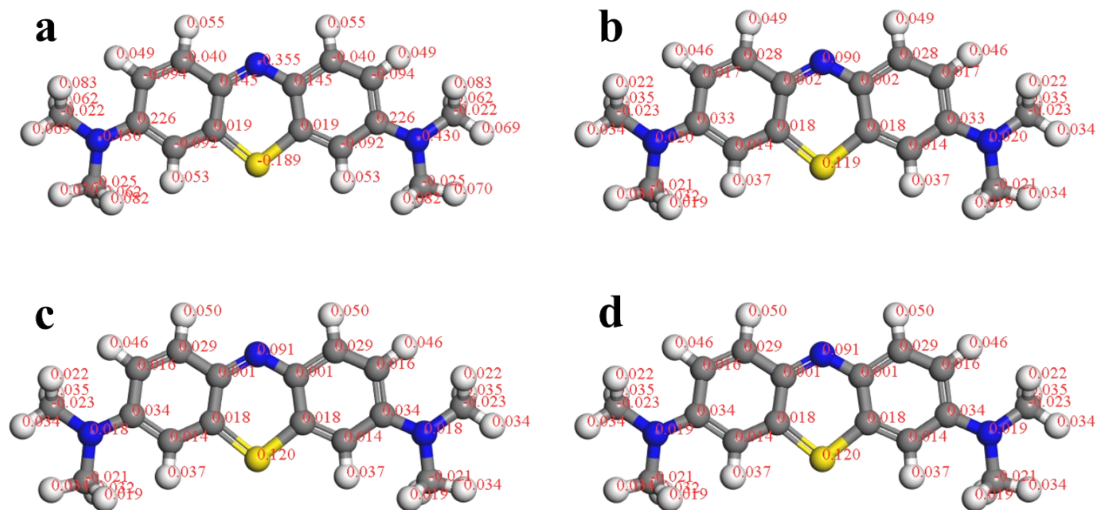

**Fig. S8.** (a) Charge amounts, (b)  $f^-$ , (c)  $f^+$ , and (d)  $f^0$  of each atom on MB.



## References

- Al-Wabel, M., Elfaki, J., Usman, A., Hussain, Q., Ok, Y.S., 2019. Performance of dry water- and porous carbon-based sorbents for carbon dioxide capture. *Environmental Research* 174, 69-79. <https://doi.org/10.1016/j.envres.2019.04.020>.
- Chen, F., Sun, Y., Liang, C., Yang, T., Mi, S., Dai, Y., Yu, M., Yao, Q., 2022. Adsorption characteristics and mechanisms of Cd<sup>2+</sup> from aqueous solution by biochar derived from corn stover. *Scientific Reports* 12, 17714. <https://doi.org/10.1038/s41598-022-22714-y>.
- Mayakaduwa, S.S., Herath, I., Ok, Y.S., Mohan, D., Vithanage, M., 2017. Insights into aqueous carbofuran removal by modified and non-modified rice husk biochars. *Environmental Science and Pollution Research* 24, 22755-22763. <https://doi.org/10.1007/s11356-016-7430-6>.
- Rong, K., Wang, J., Zhang, Z., Zhang, J., 2020. Green synthesis of iron nanoparticles using Korla fragrant pear peel extracts for the removal of aqueous Cr(VI). *Ecological Engineering* 149, 105793. <https://doi.org/10.1016/j.ecoleng.2020.105793>.
- Tomczyk, A., Sokołowska, Z., Boguta, P., 2020. Biochar physicochemical properties: Pyrolysis temperature and feedstock kind effects. *Reviews in Environmental Science and Biotechnology* 19, 191-215. <https://doi.org/10.1007/s11157-020-09523-3>.
- Wang, X., Feng, J., Cai, Y., Fang, M., Kong, M., Alsaedi, A., Hayat, T., Tan, X., 2020. Porous biochar modified with polyethyleneimine (PEI) for effective enrichment of U(VI) in aqueous solution. *Science of the Total Environment* 708, 134575. <https://doi.org/https://doi.org/10.1016/j.scitotenv.2019.134575>.
